# Supplementary material for: Trial-Level and Contiguous Syntactic Adaptation: A Common Domain-General Mechanism at Play?
Source: MDPI journal article supplement (doi:10.3390/languages9030073), 2024-02-23
Supplement: s1 [file s1]

**Experimental and filler items use in Experiments 1-4 in the paper ‘...’ by Varvara Kuz, Fangzhou Cai, Keyue Chen, Jiaxin Chen, Xuzi Qi, Clement Veall, Yuanqi Zheng, Zhengping Xu, Andrea Santi**

**Experiment 1**

Experimental and filler items were adapted from Fine and Jaeger (2016)

Experimental sentences

1. The teenage girls (who were) begged in the hallway answered the headmaster rudely.
2. The postgrad students (who were) cheated during their exams left to go home.
3. The thoughtless secretaries (who were) called on the balcony returned to their desks.
4. The computer programmers (who were) guaranteed the hard problem knew what to do.
5. The alert soldiers (who were) unloaded from their helicopter found their target quickly.
6. The rude tourists (who were) heard on their balcony were asked to leave.
7. The large package (that was) dropped from the plane hit several tall trees.
8. A yellow frisbee (that was) dangled from the roof landed in the ditch.
9. Monica’s blue pen (that was) rested on the desk wound up getting stolen.
10. The nervous wrestler (who was) hurried through the stands hadn't seen his opponent.
11. The frightened kid (who was) moved through the crowd got separated from Jane.
12. An impatient shopper (who was) shoved through the doors complained to the manager.
13. The overprotective mother (who was) helped in the office would eventually calm down.
14. The pawnshop owner (who was) pushed through the doors got into a fight.
15. The evil genie (who was) served the golden figs went into a trance.
16. The kitchen staff (who were) rushed in the cafeteria soon got very sleepy.
17. The sunburned boys (who were) fed the hot dogs got a stomach ache.
18. The sleepy volunteers (who were) offered the hot soup were glad to sit.
19. The young technician (who was) taught the computer programme caught on right away.
20. The young cyclist (who was) coached the new technique became much more competitive.
21. The experienced chef (who was) assured about the stove burnt his hand badly.
22. Several angry workers (who were) warned about low wages decided to file complaints.
23. The experienced soldiers (who were) asked about the dangers conducted the midnight raid.
24. Some rescue workers (who were) advised about the avalanche decided to stand by.
25. The cotton farmers (who were) told about bad floods had no other crops.
26. The calico cat (who was) licked in the alley ran into the street.
27. The ageing professors (who was) phoned about the exam were caught off guard.
28. The dirty hikers (who were) washed in the stream set up their camp.
29. The hippie children (who were) rinsed in the river were later taken berry-picking.
30. The Indian children (who were) scrubbed in the river splashed and shouted loudly.
31. The hospital patient (who was) bathed in his room read the newspaper constantly.
32. The hyper puppy (who was) watched at the kennel played with a ball.
33. The young children (who were) stopped in the hallway were following the adults.
34. The brown sparrow (who was) signaled on a branch pecked at an insect.
35. The crooked politician (who was) recognized in his office committed numerous serious crimes.
36. The silly boys (who were) remembered during the play quickly left the auditorium.

Experimental item questions

1. Did someone beg the teenage girls in the hallway?

2. Did the postgrads get cheated of something during their exams?
3. Did someone call the secretaries while they were on the balcony?
4. Were the programmers guaranteed the hard problem?
5. Was the target found by the soldiers in good time?
6. Did someone ask the rude tourists to leave?
7. Were several trees hit by the package?
8. Was a frisbee dangled from the roof?
9. Did someone take Monica's pen?
10. Was the wrestler hurried through the stands?
11. Did the kid get separated from Jane?
12. Did someone shove an impatient shopper through the doors?
13. Did someone help the overprotective mother in the office?
14. Did someone push the pawnshop owner through the doors?
15. Did someone serve the golden figs to the evil genie?
16. Were the kitchen staff rushed in the cafeteria?
17. Did the boys have a stomach ache?
18. Were the volunteers glad to be off their feet?
19. Did someone teach the technician the programme?
20. Did the cyclist become more competitive?
21. Was the chef assured about the stove?
22. Were complaints going to be filed by several angry workers?
23. Was the midnight raid conducted by experienced soldiers?
24. Did some rescue workers decide to not take action?
25. Were the cotton farmers told about floods?
26. Did the cat run into the street?
27. Were the ageing professors called on the phone?
28. Were the dirty hikers washed in the stream?
29. Were the children rinsed in the river?
30. Were the children noisy?
31. Was the hospital patient bathed in his room?
32. Was the hyper puppy watched at the kennel?
33. Were the young children stopped in the hallway?
34. Was the sparrow signaled on a branch?
35. Did the politician commit many crimes?
36. Did the boys leave the auditorium in a rush?

#### Filler sentences

1. The new student was noticed by everyone when he came into the room.
2. The bulldozers were removing rubble from the demolished building.
3. The school headmaster laboured constantly all summer dealing with paperwork.
4. The package arrived too late to be of any use.
5. The prisoners were unable to cross the field without being seen.
6. Many of the city cops refuse to work in the rough parts of town.
7. All the parents at the meeting strongly disagreed with the new policy.
8. The espresso machine was broken for months before finally being fixed.
9. The quilts were sold by the side of the road for ten pounds.
10. The English teacher gave the class a take-home test.
11. The valuable lamp was broken by the mischievous boy.

12. The rugby team threw a party which they were sure would win them friends.
13. The squirrels gathered many nuts before the storm arrived.
14. Some of the university students move into halls as early as August.
15. The well-known philanthropist had a party every summer.
16. The film critic wept at the end of his favourite French film.
17. The students finished the computer programme in just a few hours.
18. The map's labels for the former Soviet states were out of date.
19. The drill sergeant had forced the men to do hundreds of push-ups and sit-ups.
20. The nurses working in the intensive care unit all wanted to have more holidays off.
21. The new experiment was the source of a great deal of excitement in the lab.
22. The former drug addict's memoirs were met with critical acclaim.
23. The shop manager carefully tended to both the interior and exterior of the store.
24. The truck veered off the road after its brakes failed.
25. The band had to set up their own equipment before the concert.
26. The artist drew a beautiful portrait of his sister.
27. The volcano was a painful reminder of the eruption in the town several years ago.
28. The girls on the basketball team practiced and trained all summer.
29. The record store had sold albums primarily to college students in the neighborhood.
30. The storekeepers were afraid that riots would ensue after the hometeam won the tournament.
31. Each of the taxi drivers had their own favorite route to get to the airport.
32. The documentary did not accurately portray the events surrounding the political scandal.
33. The street lamps usually came on automatically just before dark.
34. The physics professor at the university was finally going to retire.
35. The French teacher gave her student a French film from the early 1950s.
36. The pans crashed loudly as they fell to the floor.
37. The power plant deserved more attention from the candidates during the election.
38. The laptops were too expensive for most of the students.
39. The library was open to all members of the community since it was supported by taxes.
40. The vacant building overlooks the river that winds through town.
41. All the undergraduates in the class had trouble keeping up.
42. The hotel bathroom paint was peeling after years of exposure to moisture.
43. The lifeguard kept an eye on his part of the beach all day.
44. Warm milk always soothed the infants in the nursery.
45. The record executive made a deal with the band as they were getting so much attention in the city.
46. The footballers ran a mile each day before the season started.
47. The police threw a man in jail for robbing a liquor store.
48. The school librarian chose books that the library patrons would enjoy.
49. The old man's stamp collection was one of the world's largest.
50. The heater in the basement was so powerful that the tenants had to open their windows.
51. The eccentric professor always inspired his students to think critically about their work.
52. The fan cooled the tired swimmers as they rested.
53. The engineers at the plant wore helmets when they went near the machines.
54. All the computers were too old to sell when the pawnbroker got them.
55. The lawnmower did not always function properly when the grass was wet.
56. The corrupt politicians frequented the bars downtown.
57. The guest speaker nervously coughed before addressing the small audience.

58. The medical student's grandfather built the bedframe years ago.
59. The wallpaper was a perfect choice for the couple's new home.
60. The caretakers swept the squash courts each morning before the squash club played.
61. One of the spectators at the baseball game caught a stray ball.
62. The carpenter ended up with a sunburn.
63. The children in the park could be heard three blocks away.
64. The leader of the crime ring was always suspicious of his business partners.
65. The university town attracted lots of tourists during the summer.
66. The foreign delegates arrived at the embassy surrounded by security guards.
67. Several construction workers lost their jobs when the housing market declined.
68. The zookeepers gave the giraffes food in the evenings since giraffes refuse to eat when it's hot.
69. A group of boy scouts looked after the local cricket ground.
70. Parliament members debated trivial financial issues while the protestors grew more restless.
71. The shoppers love to spend all day at the shopping centre on the weekends.
72. The shoe salesman looked impatiently out the window while waiting for customers.

### Filler Questions

- Did the new student enter the room?
- Was the rubble removed from a field?
- Did the headmaster address the paperwork all winter?
- Did the package arrive on time?
- Were the prisoners able to cross the field without being seen?
- Were all city cops willing to work in the rough areas?
- Did the parents object to the new policy?
- Was the espresso machine thrown away when it broke?
- Were the quilts sold by the side of the road?
- Were the students given a test to complete in class?
- Was the lamp cheap?
- Did the rowing team throw a party?
- Did the squirrels fail to store food before the bad weather?
- Do some students move in as early as June?
- Was the party every spring?
- Did the critic applaud at the end of the film?
- Did the programme take days to complete?
- Were the map's labels for the former Soviet states out of date?
- Were the men forced to do a hundred laps?

Did the nurses feel they were granted sufficient holidays?

Did the lab members find the new experiment boring?

Were the former drug addict's memoirs positively received?

Was the shop neglected by the manager?

Did the truck's engine fail?

Was the equipment set up when the band arrived?

Did the artist draw his mother?

Was the volcano thought of fondly by the town?

Did the girls on the team practise all summer?

Were college students sold films?

Were storekeepers afraid riots would ensue if the hometeam lost?

Did each taxi driver have a preferred route to get to the airport?

Were the events of a sports scandal inaccurately portrayed?

Do the street lamps turn on after dark?

Was the physics professor finally going to retire?

Was the student given a British film?

Were the pans carefully placed on the table?

Was the power plant not given sufficient attention during the election?

Were the laptops affordable for most of the students?

Was the library funded by taxes?

Did the building overlook the lake in the town?

Were all of the undergraduates on top of the material?

Was the bathroom paint damaged by the fire?

Did the lifeguard not attend to his area for part of the afternoon?

Were the infants given milk to soothe them?

Were the band struggling to get recognition?

Did the footballers only run every other day?

Did the police throw a murderer in jail?

Did the school librarian choose books?

Did the old man have a coin collection?

Did tenants have to close their windows?

Did the students inspire the professor to think critically?

Were the swimmers resting?

Did the engineers at the plant go near the machines?

Were the computers ready for sale?

Did the lawnmower always work well?

Were the politicians frequenters of the cinema?

Was the audience small?

Was the bed built recently?

Was the wallpaper ideal for the new office building?

Did the caretakers sweep the courts in the evening?

Did a spectator get hit by a ball?

Did the carpenter manage to avoid getting sunburned?

Were the children being loud?

Were the business partners distrusted?

Was the town quiet in summer?

Did the delegates arrive alone?

Were houses lost?

Were the giraffes given food in the afternoon?

Was the cricket ground destroyed by the boy scouts?

Were trivial financial issues debated by parliament?

Do shoppers dislike spending the entire day at the shopping centre?

Did the salesman refuse to see customers?

## **Experiment 2**

Same Experiment and Filler items as in Experiment 1.

## **Experiment 3**

Same Experimental and Filler sentences as in Experiment 1 and 2, but with addition of 4 extra experimental items. The experimental questions were also manipulated the clause it probed (main clause vs relative clause). The questions were either in active or passive voice (not manipulated)

### Experimental sentences

37. The construction equipment sat on the roof fell to the pavement.
38. The experienced waitress who was cooked the grilled chicken sent her food back.
39. The six volunteers taught the complicated procedure became very good students.
40. The eager bartender who was declared the new manager worked till past midnight.

### Experimental item questions

1. Did someone call the secretaries while they were on the balcony? – RC-ACTIVE  
Did the secretaries return to their desks? – MC-ACTIVE
2. Did someone beg the teenage girls in the hallway? – RC-ACTIVE  
  
Did the teenage girls respond rudely to the headmaster? – MC-ACTIVE
3. Were the programmers guaranteed the hard problem? – RC-PASSIVE  
Did the programmers know an approach to the hard problem? – MC-ACTIVE
4. Were the postgrads cheated of something during their exams? – RC-PASSIVE  
Did the postgrads leave to go home? – MC-ACTIVE
5. Did someone hear the rude tourists on their balcony? – RC-ACTIVE  
Did someone ask the rude tourists to leave? – MC-ACTIVE
6. Were the alert soldiers unloaded from their helicopter? – RC-PASSIVE  
Was the target found by the alert soldiers in good time? – MC-PASSIVE
7. Was a frisbee dangled from the roof? – RC-PASSIVE  
Did the frisbee land in the ditch? – MC-ACTIVE
8. Was the package dropped from the plane? – RC-PASSIVE  
Were several trees hit by the package? – MC-PASSIVE
9. Was the blue pen on the desk initially? – RC-ACTIVE  
Did someone take Monica's pen? – MC-ACTIVE
10. Was the kid moved through the crowd? – RC-PASSIVE  
Did the kid get separated from Jane? – MC-PASSIVE
11. Did someone shove the impatient shopper through the doors? – RC-ACTIVE  
Was the manager complained to by the impatient shopper? – MC-PASSIVE
12. Was the wrestler hurried through the stands? – RC-PASSIVE  
Was the opponent not seen by the wrestler? – MC-PASSIVE
13. Did someone help the mother in the office? – RC-ACTIVE  
Would the mother eventually calm down? – MC-ACTIVE
14. Did someone push the pawnshop owner through the doors? – RC-ACTIVE  
Did the pawnshop owner get into a fight? – MC-ACTIVE
15. Did someone serve the golden figs to the evil genie? – RC-ACTIVE  
Did the evil genie go into a trance? – MC-ACTIVE
16. Were the staff rushed in the cafeteria? – RC-PASSIVE  
Did the staff get drowsy? – MC-ACTIVE
17. Did someone feed the boys the hot dogs? – RC-ACTIVE  
Did the boys feel unwell? – MC-ACTIVE
18. Did someone offer the volunteers some soup? – RC-ACTIVE  
Were the volunteers glad to be off their feet? – MC-ACTIVE
19. Did someone teach the technician the programme? – RC-ACTIVE  
Was the programme easily understood by the technician? – MC-PASSIVE
20. Was the chef assured about the stove? – RC-PASSIVE  
Was the chef's hand injured? – MC-PASSIVE
21. Did someone coach the cyclist? – RC-ACTIVE  
Did the cyclist increase in competitiveness? – MC-ACTIVE
22. Did someone warn several workers about low wages? – RC-ACTIVE  
Were complaints going to be filed by several workers? – MC-PASSIVE
23. Were experienced soldiers queried about the dangers? – RC-PASSIVE

- Was the raid carried out by experienced soldiers? – MC-PASSIVE
24. Did someone advise some rescue workers about the avalanche? – RC-ACTIVE  
Was a decision to not act taken by some rescue workers? – MC-PASSIVE
25. Were the ageing professors called on the phone? – RC-PASSIVE  
Were the ageing professors caught off guard? – MC-PASSIVE
26. Were the cotton farmers informed about floods? – RC-PASSIVE
- Were no other crops owned by the cotton farmers? – MC-PASSIVE
27. Was the calico cat licked in the alley? – RC-PASSIVE  
Did the calico cat run into the street? – MC-ACTIVE
28. Did someone scrub the children? – RC-ACTIVE  
Were the children noisy? – MC-ACTIVE
29. Did the dirty hikers get cleaned in the stream? – RC-PASSIVE  
Was the camp set up by the dirty hikers? – MC-PASSIVE
30. Were the children rinsed in the river? – MC-ACTIVE  
Did someone take the children berry-picking? – MC-ACTIVE
31. Was the hospital patient bathed in his room? – RC-PASSIVE  
Was the newspaper read by the hospital patient? – MC-PASSIVE
32. Was the puppy watched at the kennel? – RC-PASSIVE  
Was a ball played with by the puppy? – MC-PASSIVE
33. Were the young children stopped in the hallway? – RC-PASSIVE  
Were the adults followed by the young children? – MC-PASSIVE
34. Was the sparrow signaled on a branch? – RC-PASSIVE  
Was the insect pecked at by the sparrow? – MC-PASSIVE
35. Did someone remember the boys during the play? – RC-ACTIVE  
Did the boys leave the auditorium in a rush? – MC-ACTIVE
36. Did someone recognize the politician? – RC-ACTIVE  
Were many crimes committed by the politician? – MC-PASSIVE
37. Did someone put the equipment on the roof? – RC-ACTIVE  
Did the equipment fall onto the pavement? – MC-ACTIVE
38. Was the waitress cooked the grilled chicken? – RC-PASSIVE  
Was the food sent back by the waitress? – MC-PASSIVE
39. Did someone teach the volunteers the procedure? – RC-ACTIVE  
Did the volunteers become very good students? – MC-ACTIVE
40. Did someone declare the bartender to be the new manager? – RC-ACTIVE  
Did the bartender work late? – MC-ACTIVE

#### **Experiment 4**

Experimental and Filler items were adapted from Hsu and Novick (2016).

#### Experimental sentences

1. Put the horse on the binder onto the scarf.
2. Put the mug that's on the blanket onto the doormat.
3. Put the snake on the glove onto the doily.
4. Put the goat that's on the pillow onto the calendar.
5. Put the screwdriver on the book onto the newspaper.
6. Put the lion that's on the tissue onto the phonebook.
7. Put the hammer on the pan onto the box.



8. Put the giraffe that's on the t-shirt onto the table.
9. Put the lime on the sweater onto the envelope.
10. Put the hammer that's on the tray onto the t-shirt.
11. Put the cat on the sponge onto the box.
12. Put the cup that's on the t-shirt onto the newspaper.
13. Put the cucumber on the scarf onto the book.
14. Put the rock that's on the book onto the glove.
15. Put the bear on the box onto the doormat.
16. Put the lion that's on the napkin onto the binder.
17. Put the stapler on the beermat onto the blanket.
18. Put the frog that's on the napkin onto the binder.
19. Put the cup on the box onto the tray.
20. Put the cat that's on the folder onto the scarf.
21. Put the walrus on the t-shirt onto the pillow.
22. Put the bear that's on the paper onto the magazine.
23. Put the buffalo on the paper onto the plate.
24. Put the pig that's on the magazine onto the notebook.
25. Put the hippo on the glove onto the magazine.
26. Put the candy that's on the notebook onto the sponge.
27. Put the lime on the binder onto the doily.
28. Put the candle that's on the plate onto the card.
29. Put the pear on the doormat onto the napkin.
30. Put the giraffe that's on the newspaper onto the towel.
31. Put the marker on the blanket onto the scarf.
32. Put the frog that's on the beermat onto the sweater.
33. Put the rat on the sponge onto the sweater.
34. Put the candy that's on the blanket onto the doormat.
35. Put the monkey on the doormat onto the board.
36. Put the watch that's on the notebook onto the plate.
37. Put the orange on the plate onto the tray.
38. Put the apple that's on the envelope onto the card.
39. Put the glass on the glove onto the book.
40. Put the elephant that's on the newspaper onto the towel.
41. Put the bell on the napkin onto the pillow.
42. Put the apple that's on the card onto the pan.
43. Put the orange on the pan onto the pillow.
44. Put the peach that's on the doily onto the beermat.
45. Put the monkey on the sweater onto the folder.
46. Put the elephant that's on the pillow onto the blanket.
47. Put the dog on the towel onto the paper.
48. Put the goat that's on the folder onto the tray.

#### Experimental item questions

1. Which object was moved?
2. Which object was moved?
3. Which object was moved?
4. Which object was moved?
5. Which object was moved?

6. Which object was moved?
7. Which object was moved?
8. Which object was moved?
9. Which object was moved?
10. Which object was moved?
11. Which object was moved?
12. Which object was moved?
13. Which object was moved?
14. Which object was moved?
15. Which object was moved?
16. Which object was moved?
17. Where was the stapler initially (before being moved)?
18. Where was the frog initially (before being moved)?
19. Where was the cup initially (before being moved)?
20. Where was the cat initially (before being moved)?
21. Where was the walrus initially (before being moved)?
22. Where was the bear initially (before being moved)?
23. Where was the buffalo initially (before being moved)?
24. Where was the pig initially (before being moved)?
25. Where was the hippo initially (before being moved)?
26. Where was the candy initially (before being moved)?
27. Where was the lime initially (before being moved)?
28. Where was the candle initially (before being moved)?
29. Where was the pear initially (before being moved)?
30. Where was the giraffe initially (before being moved)?
31. Where was the marker initially (before being moved)?
32. Where was the frog initially (before being moved)?
33. Where is the rat now (after being moved)?
34. Where is the candy now (after being moved)?
35. Where is the monkey now (after being moved)?
36. Where is the watch now (after being moved)?
37. Where is the orange now (after being moved)?
38. Where is the apple now (after being moved)?
39. Where is the glass now (after being moved)?
40. Where is the elephant now (after being moved)?
41. Where is the bell now (after being moved)?
42. Where is the apple now (after being moved)?
43. Where is the orange now (after being moved)?
44. Where is the peach now (after being moved)?
45. Where is the monkey now (after being moved)?
46. Where is the elephant now (after being moved)?
47. Where is the dog now (after being moved)?
48. Where is the goat now (after being moved)?

#### Filler sentences

1. Put the walrus on the paper and then move the walrus to the right of it.
2. Put the eagle on the doormat and then place the cow there too.
3. Put the glasses on the tray and then put the scarf below both of them.

4. Put the mugs together and then put the mouse next to them.
5. Put the rat to the left of the marker and then drag the rat below it.
6. Put the bowl near the glove and then move the pen there too.
7. Put the cow on the table and then place the coin there too.
8. Put the pears together and then put the hats next to the pears.
9. Put the dog under the table and then push the dog to the left of it.
10. Put the scarves together and then put the bag next to them.
11. Put the hippos together and then put the cat on the book.
12. Put the bell next to the box and then put the notebook below it.
13. Put the pencil to the right of the newspaper and then push the pencil above it.
14. Put the goat on the doily and then put the plate there too.
15. Put the sock next to the tissue and then put the pig on the tissue.
16. Put the pencil next to the keys and then put the bottle next to the pencil.
17. Put the shark next to the pig and then move them downwards.
18. Put the lime near the board and then put the candy on the board.
19. Put the paper next to the mug and place the dog above them.
20. Put the bowl onto the card and place the mug beside the card.
21. Put the walrus onto the sponge and then slide the walrus to the left of it.
22. Put the elephant next to the horse and then drag the cow beside them.
23. Put the glasses on the notebook and then move the scissors there too.
24. Put the turkey on the board and then place the squirrel next to the board.
25. Put the candies next to the mug and then push the candies upwards.
26. Put the lions next to the sheep and then slide the neckties next to them.
27. Put the mug on the towel and place the spoon to the left of them.
28. Put the sheep on the magazine and place the owl next to the sheep.
29. Put the beaver onto the index card and then move the beaver to the left of it.
30. Put the peaches next to each other and then slide the banana beside them.
31. Put the eagle on the envelope and put the flower there too.
32. Put the rat onto the tissue and move the monkey beside the tissue.
33. Put the cat next to the sponge.
34. Put the rock on top of the tray.
35. Put the cow onto the scarf.
36. Put the candles together.
37. Put the turtle on the doily.
38. Put the monkeys next to each other.
39. Put the sock on the phonebook.
40. Put the snake next to the newspaper.
41. Put the horse on the book.
42. Put the scarf onto the doormat.
43. Put the screwdriver next to the ball.
44. Put the mouse on the plate.
45. Put the bell next to the box.
46. Put the binder on the plate.
47. Put the beaver near the pillow.
48. Put the board next to the watch.

#### Filler Questions

1. Which object was moved?

2. Which object was moved?
3. Where is the scarf now (after being moved)?
4. Which object was moved first?
5. Where is the rat now (after being moved)?
6. Where is the pen now (after being moved)?
7. Which object was moved?
8. Which objects were moved first
9. Which object was moved?
10. Where is the bag now (after being moved)?
11. Where is the cat now (after being moved)?
12. Which object was moved?
13. Where is the pencil now (after being moved)?
14. Which object was moved last?
15. Which object was moved first?
16. Where is the bottle now (after being moved)?
17. Which object was moved first?
18. Where is the candy now (after being moved)?
19. Where is the dog now (after being moved)?
20. Where is the bowl now (after being moved)?
21. Which object was moved?
22. Which object was moved?
23. Where are the glasses now (after being moved)?
24. Where is the squirrel now (after being moved)?
25. Which object was moved?
26. Where are the lions now (after being moved)?
27. Which object is on the towel?
28. Which object was moved?
29. Where is the beaver now (after being moved)?
30. Where are the peaches now (after being moved)?
31. Which object is on the envelope?
32. Where is the rat now (after being moved)?
33. Which object was moved?
34. Which object was moved?
35. Which object was moved?
36. Which objects were moved?
37. Which object was moved?
38. Which objects were moved?
39. Which object was moved?
40. Which object was moved?
41. Which object was moved?
42. Which object was moved?
43. Which object was moved?
44. Which object was moved?
45. Which object was moved?
46. Which object was moved?
47. Which object was moved?
48. Which object was moved?
